1 **Temporal changes in species composition affect a ubiquitous species' views of patch quality**

2

3 Ellen K. Bledsoe, School of Natural Resources and Environment, University of Florida,

4 [ellen.bledsoe@ufl.edu](mailto:ellen.bledsoe@ufl.edu) [corresponding author]

5

6 S. K. Morgan Ernest, Department of Wildlife Ecology and Conservation, University of Florida,

7 [skmorgane@ufl.edu](mailto:skmorgane@ufl.edu)

8

9 **Abstract**

10 Metacommunity theory, particularly the patch dynamics archetype, suggests that an organism's  
11 perspective of patch quality can depend solely on the local competitive environment. Across  
12 landscapes, however, shifts in species composition often co-occur with shifts in habitat, making  
13 it difficult to disentangle the role of competitors and environment on assessments of patch  
14 quality. Using 26 years of rodent community time-series data, we show that perception of patch  
15 quality by a small, ubiquitous granivore (*Chaetodipus penicillatus*) shifted with both spatial and  
16 temporal changes in species composition. In the mid-1990s, *C. baileyi*, a novel competitor,  
17 colonized and the study site. *C. penicillatus* patch preference shifted with increasing abundance  
18 of *C. baileyi*, including corresponding changes in estimated survival, probability of movement  
19 between patches, and the arrival of new individuals in patches. Changes in energy use on patches  
20 due to the establishment of *C. baileyi* point to a potential mechanism for the differences in patch  
21 quality perceived by *C. penicillatus*. These results demonstrate that experimental time-series data  
22 can be used to examine how changes in species composition and, specifically, changes in the  
23 competitive landscape, can affect perception of patch quality and patch preference.

24 **Key words:** metacommunity, patch heterogeneity, patch preference, species composition

25

## 26 **Introduction**

27       Species often exist on continuous landscapes consisting of a patchwork of habitats, some  
28 of which are conducive to a species' survival and reproduction and others which are less suitable.  
29 The long-term persistence of a species on one of these landscapes is a function of both its  
30 interactions with other species within suitable patches and the ability of it and its enemies to  
31 move across this landscape (Huffaker 1958, Ricklefs 1987). One framework developed to study  
32 such scenarios is metacommunity theory (Leibold et al. 2004). A metacommunity is a group of  
33 interacting communities (or "localities") connected by dispersal (Wilson 1992, Leibold et al.  
34 2004). One of the most useful aspects of the metacommunity framework is the ability to  
35 simultaneously consider multiple processes that are acting at different scales. Within patches,  
36 multiple populations of species interact, and mechanisms of species coexistence play an  
37 important role. These local communities, however, are also connected to each other at a larger  
38 scale where regional processes (e.g., dispersal, colonization and extinction events, and landscape  
39 heterogeneity) become increasingly important. Two main messages have emerged from  
40 metacommunity theory since its formal proposal by Leibold et al. (2004): 1) metacommunities  
41 represent the interaction of local and regional processes and the scales at which they operate, and  
42 2) *some* type of patch heterogeneity remains an integral assumption to the vast majority of work  
43 on metacommunities (Leibold & Chase 2018).

44       Landscape heterogeneity in patches is important for maintaining diverse  
45 metacommunities. Variability in environmental conditions creates niche opportunities (Comins  
46 & Noble 1985), while variability in patch connectivity supports scenarios where populations can  
47 be rescued from extinction by dispersal (Brown & Kodric-Brown 1977) or where species can

48 find isolated refuges when they would otherwise be driven extinct (Sedell et al. 1990).  
49 Metacommunity ecology often focuses on spatial patterns in heterogeneity—differences between  
50 patches in habitat (e.g., vegetation structure) or abiotic conditions (e.g., temperature, soil  
51 conditions). However, changes in patch conditions can also take place through time (Azeria &  
52 Kolasa 2008, Ernest et al. 2008), resulting in patches that may vary in their suitability for a  
53 species as conditions change in the future. Despite the fact that population dynamics and regional  
54 processes (i.e., dispersal, colonization, extinction) are inherently both spatial *and* temporal,  
55 temporal variation in patch heterogeneity is not frequently incorporated into the metacommunity  
56 framework.

57         An organism's perspective on the quality of a patch not only depends on the  
58 environmental conditions of a patch but also the local competitive environment (i.e.,  
59 colonization-competition trade-offs; Levins & Culver 1971, Tilman 1994). For example, two  
60 patches of equivalent environment may differ considerably in their suitability for a species based  
61 solely on the presence or absence of a dominant competitor (Durant 1998). Because  
62 metacommunities are embedded in dynamic landscapes, the impact of a dominant competitor on  
63 a subdominant species' patch preferences may also vary over time depending on the resource-  
64 supply rates or shifts in the competitive hierarchy (Tilman 1982, Amarasekare et al. 2004).  
65 Understanding a species' perception of biotically-induced changes in patch quality over time is  
66 complicated because shifts in species composition often co-occur across landscapes with shifts in  
67 habitat (MacArthur et al. 1966, Whittaker 1967, Tews et al. 2004). Species may be less abundant  
68 or absent from certain patches, but whether that absence is due to the patch having an  
69 incompatible environment, the isolation of the patch from other patches, the presence of superior  
70 competitors, or a combination of any of the above reasons is often unclear. Thus, the role of

71 shifting biotic conditions in determining how a species views the patchy landscape is often  
72 difficult to disentangle (Kraft et al. 2015).

73 To understand how shifts in species composition can alter a species' perception of patch  
74 quality, we can leverage long-term experiments manipulating the presence of dominant species  
75 across patches. If conducted at a small enough spatial scale, these species manipulations are  
76 independent of landscape-level changes in environmental conditions that often are correlated  
77 with changes in species composition. In this study, we use time-series data from a desert rodent  
78 community in southeastern Arizona, USA, to show how both spatial *and* temporal variation in  
79 the competitive biotic landscape affect species and their perception of patch quality. Our system  
80 has both control plots (all rodents have access) and manipulated plots in which kangaroo rats, the  
81 behaviorally dominant genus in the system, are selectively excluded. Recent studies have shown  
82 only minimal impacts of the treatment on the plant community (Supp et al. 2012, Christensen et  
83 al. 2018); thus, this system creates a landscape with patches differing in quality due primarily to  
84 differences in rodent species composition caused by the removal of the dominant competitor,  
85 kangaroo rats. In the mid-1990s, this competitive landscape was altered when a species of large  
86 pocket mouse (*Chaetodipus baileyi*) colonized. It rapidly became one of the most abundant  
87 species at the site for over two decades but exhibited a preference for kangaroo rat enclosure  
88 plots. Here, we ask how the patch preference of a small, subdominant pocket mouse, *C.*  
89 *penicillatus*, across this landscape of patches with and without kangaroo rats was impacted by  
90 the change in the competitive landscape with the arrival of the larger pocket mouse, *C. baileyi*.

91

## 92 **Methods**

### 93 *Study System and Data*

94 We used a 26-year time series (1988 – 2014) of capture-mark-recapture rodent data  
95 collected from the Portal Project to see how *C. penicillatus* responded to the arrival of a novel  
96 competitor, *C. baileyi*, through time. The Portal Project, started in 1977, is a long-term  
97 experimental system (Brown et al. 1998) located in the Chihuahuan desert near Portal, Arizona,  
98 USA, on colonized land of the Chiricahua Apache now under the jurisdiction of the U.S. Bureau  
99 of Land Management. The site consists of 24 50x50 m fenced plots with three treatment types. In  
100 control plots ( $n = 10$ ), holes cut in the fence are large enough to allow all rodent species access  
101 while full rodent removal plots ( $n = 6$ ) have no gates. Kangaroo rat exclosures ( $n = 8$ ) have small  
102 holes in the fences which allow passage of all rodents except for kangaroo rats (*Dipodomys*  
103 genus), which are behaviorally dominant in the system (Brown & Heske 1990). Each plot  
104 consists of 49 evenly-spaced permanent trapping stations in a 7x7 grid. Rodent abundance and  
105 composition data are collected monthly using Sherman live traps (Ernest et al. 2018). We  
106 identify trapped individuals to species, measure and record size and sex characteristics, and give  
107 each rodent an individualizing marker. In the past, toe and ear tags were used to mark  
108 individuals, but we now exclusively use passive integrated transponder (PIT) tags. We excluded  
109 data collected after 2014 because the treatments for many plots changed in early 2015.

110

### 111 *Analyses*

112 All analyses were performed using R 3.5.0 (R Core Team 2018). Data and code are available on  
113 GitHub (<https://github.com/weecology/PortalData>; [https://github.com/bleds22e/PP\\_shifts](https://github.com/bleds22e/PP_shifts)).

114

115 *Patch preference of C. penicillatus in response to C. baileyi abundance*

116 To determine how *C. penicillatus* abundance in control plots and kangaroo rat exclosures  
117 differed from equal through time, we fit a linear model along the 1:1 line of mean *C. penicillatus*  
118 per plot by year in kangaroo rat exclosures against control plots. We then fit a linear generalized  
119 least squares model (*nlme*, Pinheiro et al., 2018) of mean *C. baileyi* per plot by year against the  
120 resulting residuals from the previous model to demonstrate how *C. baileyi* mean abundance  
121 relates to *C. penicillatus*' plot treatment preferences. Accounting for temporal autocorrelation did  
122 not significantly improve the model (see supplemental material for details).

123

#### 124 *Population-level metrics of C. penicillatus*

125 For *C. penicillatus* in each treatment, we calculated apparent survival ( $S$ ), transition  
126 probability ( $\Psi$ ), and the average number of new individuals per plot type. Both survival and  
127 transition probability were estimated through a multistate capture-mark-recapture model using  
128 the *RMark* package, an R interface for the MARK software (White & Burnham 1999; Laake,  
129 2013). Different strata represented treatment types, and each time step was a trapping period. We  
130 designated each time period as being either before or after the establishment of *C. baileyi* in the  
131 system; the first trapping period in which *C. baileyi* was caught in all eight kangaroo rat  
132 exclosures (July 1997) was used as the differentiating timepoint. In the model, we assumed that  
133 recapture probabilities ( $p$ ) were equal between the plot types. Additionally, it should be noted  
134 that our data does not allow for differentiation between permanent emigration and death, and,  
135 therefore, these two processes are not differentiated in our survival estimates. We used Program  
136 CONTRAST, a program designed specifically for comparing survival estimates (Hines & Sauer  
137 1989), to run chi-squared tests to determine if differences in survival and transition probabilities  
138 between *C. baileyi* establishment and treatment types were statistically significant.

139 We calculated the number of new *C. penicillatus* individuals, defined as individuals  
140 caught and given an identification tags, for the first time, in each treatment type. We then  
141 calculated mean and standard error of new *C. penicillatus* individuals per plot by year by  
142 treatment type.

143

#### 144 *System-level aspects of patch preference*

145 Changes in species composition have been shown to have substantial effects on the  
146 energy use in a system (Ernest & Brown 2001). To determine how this aspect of ecosystem  
147 functioning might have contributed to how *C. penicillatus* view the quality of patches through  
148 time, we calculated the ratio of total rodent biomass per year between the kangaroo rat  
149 exclosures and control plots (*portalr*; Yenni et al. 2018).

150

## 151 **Results**

### 152 *Patch preference of C. penicillatus in response to C. baileyi abundance*

153 After its arrival in the mid-1990s, *C. baileyi* increased in abundance until the late 2000's  
154 (Fig. 1a) and was found far more frequently on the kangaroo rat exclosures than the control plots  
155 (Fig. S1). *C. penicillatus*' preferences for the two treatment types also shifted through time (Fig.  
156 1b). *C. penicillatus* had higher average abundance in the kangaroo rat exclosure plots before *C.*  
157 *baileyi* arrived. During the time *C. baileyi* was established, however, *C. penicillatus* had a higher  
158 average abundance on control plots. *C. penicillatus*'s preference for control plots increased with  
159 increases in *C. baileyi* abundance (Fig. 1c;  $y = -0.163x + 0.662$ ,  $df = 20$ ,  $RSE = 0.46$ ,  $p < 0.05$ ).

160

### 161 *Population-level metrics of C. penicillatus*

162 Estimated survival of *C. penicillatus* showed significant differences between treatment  
163 types and *C. baileyi* status ( $\chi^2 = 15.22$ ,  $df = 3$ ,  $p = 0.002$ ). Before *C. baileyi* colonized the site,  
164 estimated survival for *C. penicillatus* was significantly higher on kangaroo rat exclosures than on  
165 controls (Fig. 2a). This difference completely disappears after *C. baileyi* becomes established, at  
166 which point estimated survival becomes statistically indistinguishable between treatment types.

167 The transition probability of *C. penicillatus* also showed significant differences between  
168 treatment types and *C. baileyi* status ( $\chi^2 = 12.44$ ,  $df = 3$ ,  $p = 0.006$ ). The probability of a *C.*  
169 *penicillatus* individual moving from a kangaroo rat exclosure to a control plot was low,  
170 regardless of *C. baileyi* establishment (Fig. 2b). When a *C. penicillatus* individual moved before  
171 *C. baileyi*'s arrival, it was more likely to move from a control plot to a kangaroo rat exclosure.  
172 Afterwards, however, the probability of a *C. penicillatus* individual moving from a control plot  
173 to a kangaroo rat exclosure was not only significantly lower than before *C. baileyi* establishment  
174 but also significantly lower than the probability of movement in the other direction (Fig. 2b).

175 The differences in arrival of new (i.e., untagged) *C. penicillatus* individuals on the two  
176 treatments also support changes in patch preference (Figure 2c). Before the arrival of *C. baileyi*,  
177 kangaroo rat exclosures had, on average, slightly higher numbers of new individuals appearing.  
178 After *C. baileyi* established in the system, new individuals were consistently found on control  
179 plots in higher average numbers until the period of *C. baileyi* decline in the late 2000s.

180

### 181 *System-level aspects of patch preference*

182 Prior to *C. baileyi* fully establishing in the system, the biomass on kangaroo rat exclosure  
183 plots was only a fraction of that on control plots (Fig. 3). With the arrival of *C. baileyi*, however,



184 the average biomass on kangaroo rat enclosure plots reached over 80% of the biomass found on  
185 control plots, even with *C. penicillatus* individuals moving to the control plots.

186

## 187 **Discussion**

188 If a species changes its patch preference due to changes in the competitive landscape,  
189 there should be detectable effects on population metrics such as apparent survival, patch choice,  
190 and the probability of movement between patch types (Morris & Davidson 2000, Gurnell et al.  
191 2004). Our results show responses in all of these metrics, indicating that *C. penicillatus*  
192 perceived a substantive change in the suitability of kangaroo rat enclosures with the colonization  
193 of *C. baileyi*. Before the arrival of *C. baileyi*, *C. penicillatus* was disproportionately found in  
194 kangaroo rat enclosures and exhibited higher survival, lower transition probabilities, and a larger  
195 influx of new individuals than on the control plots. After the arrival and establishment on *C.*  
196 *baileyi* on the kangaroo rat enclosures, however, *C. penicillatus* was found disproportionately in  
197 control plots (Fig. 1), a higher number of new individuals were detected on control plots (Fig  
198 2c), and survivorship and transition probabilities converged between plot types (Fig 2ab). Thus,  
199 with the arrival of *C. baileyi*, kangaroo rat enclosures shifted from high quality patches to  
200 patches of a similar, or even slightly lower, quality as control plots. Because all patches are in  
201 more-or-less the same habitat (Supp et al. 2012, Christensen et al. 2018), this approach allowed  
202 us to disentangle effects of community composition from habitat differences on perception of  
203 patch quality by effectively eliminating the habitat changes that often coincide with changes in  
204 species composition.

205 Our results provide some insights into the mechanisms that led to higher *C. penicillatus*  
206 numbers on control plots once *C. baileyi* established on kangaroo rat enclosures. Higher *C.*

207 *penicillatus* abundances on control plots after *C. baileyi*'s establishment seems due to more new  
208 individuals being caught on control plots (Fig. 3). However, once *C. penicillatus* individuals  
209 established territories on control plots, similar apparent survivorship and transition probabilities  
210 on treatments and controls suggest they perceived little difference between these plot types after  
211 *C. baileyi* colonized. We do not know whether the higher numbers of new individuals on control  
212 plots were due to higher birth rates, higher juvenile survivorship, lower juvenile dispersal rates,  
213 or higher immigration rates for controls. Shifts in control plot birth rates, juvenile survivorship,  
214 or juvenile emigration rates would suggest that conditions on control plots had improved; we are  
215 not aware of any mechanisms, however, that would improve the quality of control plots without  
216 also improving the nearby kangaroo rat exclosures. Instead, we suspect that dispersing  
217 individuals from the surrounding matrix of desert habitat were preferentially deciding to enter  
218 control plots rather than *C. baileyi*-dominated kangaroo rat exclosures.

219 Higher immigration rates into some patches over others can reflect differences in  
220 distances to source populations (i.e., mass effects or source-sink dynamics; Schmida & Wilson  
221 1985, Holt 1985, Pulliam 1988) or active decisions by individuals based on their expected fitness  
222 or resource intake rate in a patch (e.g., Ideal Free Distribution, optimal foraging; Fretwell &  
223 Lucas 1970, Charnov 1976). Because our patches are interspersed in a matrix that is suitable  
224 habitat for *C. penicillatus*, all patches should be equidistant from a *C. penicillatus* source  
225 population. However, the colonization of *C. baileyi* on kangaroo rat exclosures had a substantive  
226 effect on rates of resource use on those plots, which may have altered foraging and fitness  
227 expectations for *C. penicillatus*. Before *C. baileyi* established in the system, rodent biomass of  
228 the kangaroo rat exclosures was never more than half of that found in the control plot (Fig. 3).  
229 With the preferential establishment of *C. baileyi* on the kangaroo rat exclosures, however, the

230 biomass ratio between the enclosure and control plots increased considerably. In addition to  
231 demonstrating the impact that the establishment of one species can have on the entire system, the  
232 biomass ratio nearing equal helps shed light on why the arrival of *C. baileyi* caused *C.*  
233 *penicillatus*'s clear shifts in patch preference (Fig. 1). The changes in biomass also correspond to  
234 changes in energy use in the system (Ernest & Brown 2001). If patches have roughly the same  
235 amount of resources, patches with lower rates of energy use should have more resources that are  
236 not being fully exploited (MacArthur & Pianka 1966). As the biomass and, subsequently, energy  
237 use in the plot types neared equal, the kangaroo rat enclosures were no longer overtly preferable,  
238 and *C. penicillatus* showed corresponding changes in patch preferences (e.g., changes in survival  
239 rates, Fig. 2a). As resource availability became more similar, the importance of resource  
240 availability in discriminating among patches may have diminished and allowed other factors to  
241 influence the decision-making process of *C. penicillatus*. One possibility is that niche similarities  
242 between *C. penicillatus* and its congener, *C. baileyi*, made establishing territories on plots with  
243 *C. baileyi* more difficult, or simply less appealing, for dispersing *C. penicillatus* individuals.

244 Species' perceptions of patch quality can vary depending on a variety of factors, such as  
245 resource availability (MacArthur & Pianka 1966), biotic interactions (Durant 1998, Gurnell et al.  
246 2004), and other habitat properties (Brown 1988, Butler et al. 2005). In many systems, changes  
247 in species composition correspond to changes in habitat (MacArthur et al. 1966, Whittaker 1967,  
248 Tews et al. 2004). Therefore, teasing apart the effects of species composition and habitat  
249 properties on a species' perception of patch quality can prove challenging. In this study, we show  
250 that experimental time-series data can be used to help elucidate how changes in species  
251 composition and, specifically, changes in the competitive landscape, can affect perception of  
252 patch quality and patch preference. This is not to suggest that changes in habitat or abiotic

253 factors do not impact patch preference; much work in landscape ecology and metacommunity  
254 theory has shown that they can (Leibold & Chase 2018); rather, we use time series and  
255 experimentally manipulated patches to tease apart the effects of species composition from those  
256 of habitat, changes which frequently occur together spatially (Durant 1998, Tews et al. 2004).  
257 This method allows us to still assess spatial use patterns—a key aspect of metacommunity  
258 theory—while also allowing changes through time to inform our observations. We suggest that  
259 time is a key component in any holistic study of patch preference in metacommunity dynamics.

260

## 261 **Acknowledgments**

262 We thank the UF Weecology group for helpful feedback on the project, Dr. Juniper L.  
263 Simonis for statistical advice on population metrics, and Dr. Sarah R. Supp for making R code  
264 from a previous project openly available, which made our analyses substantially easier. We  
265 thank the hundreds of people who have worked on the Portal Project to make this data available.  
266 This work was supported by National Science Foundation grant DEB-1622425 to SKME. EKB  
267 was additionally supported by the UF School of Natural Resources and Environment.

268

## 269 **Literature Cited**

270 Amarasekare, P., M. F. Hoopes, N. Mouquet, and M. Holyoak. 2004. Mechanisms of coexistence  
271 in competitive metacommunities. *The American Naturalist* 164(3):310-326.  
272 Azeria, E. T., and J. Kolasa. 2008. Nestedness, niche metrics and temporal dynamics of a  
273 metacommunity in a dynamic natural model system. *Oikos* 117(7): 1006-1019.

- 274 Brown, J. H. 1998. The granivory experiments at portal. In W. J. Resetarits and J. Bernardo,  
275 editors. *Experimental ecology: issue and perspectives*. Oxford University Press, New York,  
276 New York, USA.
- 277 Brown, J. H., and E. Heske. 1990. Control of a desert-grassland transition by a keystone rodent  
278 guild. *Science* 250(4988):1705-1707.
- 279 Brown, J. H., and A. Kodric-Brown. 1977. Turnover rates in insular biogeography: effect of  
280 immigration on extinction. *Ecology* 58(2):445-449.
- 281 Brown, J. S. 1988. Patch use as an indicator of habitat preference, predation risk, and  
282 competition. *Behavioral Ecology and Sociobiology* 22(1):37-47.
- 283 Butler, S. J., M. J. Whittingham, J. L. Quinn, and W. Cresswell. 2005. Quantifying the  
284 interaction between food density and habitat structure in determining patch selection. *Animal*  
285 *Behaviour* 69:337-343.
- 286 Charnov, E. L. 1976. Optimal foraging, the marginal value theorem. *Theoretical Population*  
287 *Biology* 9(2):129-136.
- 288 Christensen, E. M., G. L. Simpson, and S. K. M. Ernest. 2018. Established rodent community  
289 delays recovery of dominant competitor following experimental disturbance. *BioRxiv*  
290 503078 [Preprint]. <https://doi.org/10.1101/503078>.
- 291 Comins, H. N., and I. R. Noble. 1985. Dispersal, variability, and transient niches: species  
292 coexistence in a uniformly variable environment. *The American Naturalist* 126(5): 706-723.
- 293 Durant, S. 1998. Competition refuges and coexistence: an example from Serengeti carnivores.  
294 *Journal of Animal Ecology* 67:370-386.
- 295 Ernest, S. K. M., and J. H. Brown. 2001. Delayed compensation for missing keystone species by  
296 colonization. *Science* 292:101-104.

- 297 Ernest, S. K. M., J. H. Brown, K. M. Thibault, E. P. White, and J. P. Goheen. 2008. Zero-sum,  
298 the niche, and metacommunities: long-term dynamics of community assembly. *172:E257-69*.
- 299 Ernest, S. K. M., G. M. Yenni, G. Allington, E. K. Bledsoe, E. M. Christensen,... T. J. Valone.  
300 2018. The Portal Project: a long-term study of a Chihuahuan desert ecosystem. bioRxiv  
301 332783 [Preprint]. <https://doi.org/10.1101/332783>.
- 302 Fretwell, S. D., and H. L. Lucas, Jr. 1970. On the territorial behavior and other factors  
303 influencing habitat distribution of birds. *Acta biotheoretica* 19:16-36.
- 304 Gurnell, J., L. A. Wauters, P. W. W. Lurz, and G. Tosi. 2004. Alien species and interspecific  
305 competition: effects of introduced eastern grey squirrels on red squirrel population dynamics.  
306 *Journal of Animal Ecology* 73:26-35.
- 307 Hines, J.E., and J.R. Sauer. 1989. Program CONTRAST - A General Program for the Analysis of  
308 Several Survival or Recovery Rate Estimates. US Fish & Wildlife Service, Fish & Wildlife  
309 Technical Report 24, Washington, DC.
- 310 Holt, R. D. 1985. Population dynamics in two-patch environments: some anomalous  
311 consequences of an optimal habitat distribution. *Theoretical Population Biology* 18:363-373.
- 312 Huffaker, C. B. 1958. Experimental studies on predation: dispersion factors and predator-prey  
313 oscillations. *Hilgardia* 27:795-835.
- 314 Kraft, N. J. B., P. B. Adler, O. Godoy, E. C. James, S. Fuller, and J. M. Levine. 2015.  
315 Community assembly, coexistence and the environmental filtering metaphor. *Functional*  
316 *Ecology* 29:592-599.
- 317 Laake, J. L. 2013. RMark: An R Interface for Analysis of Capture-Recapture Data with MARK.  
318 AFSC Processed Rep 2013-01, 25p. Alaska Fish. Sci. Cent., NOAA, Natl. Mar. Fish. Serv.,  
319 7600 Sand Point Way NE, Seattle, WA 98115.

- 320 Leibold, M. A., M. Holyoak, N. Mouquet, P. Amarasekare, J. Chase,...A. Gonzalez. 2004. The  
321 metacommunity concept: a framework for multi-scale community ecology. *Ecology Letters*  
322 7:601-613.
- 323 Leibold, M. A., and J. M. Chase. 2018. *Metacommunity Ecology*. Princeton University Press,  
324 Princeton, New Jersey, USA.
- 325 Levins, R., and D. Culver. 1971. Regional coexistence of species and competition between rare  
326 species. *Proceedings of the National Academy of Sciences USA* 68:1246-1248.
- 327 MacArthur, R. W., and E. Pianka. 1996. On optimal use of a patchy environment. *The American*  
328 *Naturalist* 100:603-609.
- 329 MacArthur, R. W., H. Recher, and M. L. Cody. 1966. On the relation between habitat selection  
330 and species diversity. *American Naturalist* 100:319-332.
- 331 Morris, D. W., and D. L. Davidson. 2000. Optimally foraging mice match patch use with habitat  
332 differences in fitness. *Ecology* 81(8):2061-2066.
- 333 Pinheiro, J., D. Bates, S. DebRoy, D. Sarkar, and R Core Team. 2018. nlme: Linear and  
334 Nonlinear Mixed Effects Models. R package version 3.1-131.1, URL: [https://CRAN.R-](https://CRAN.R-project.org/package=nlme)  
335 [project.org/package=nlme](https://CRAN.R-project.org/package=nlme).
- 336 Pulliam. H. R. 1988. Sources, sinks, and population regulation. *The American Naturalist*  
337 132:652-661.
- 338 R Core Team. 2018. R version 3.5.0. R: A language and environment for statistical computing. R  
339 Foundation for Statistical Computing, Vienna, Austria.
- 340 Ricklefs, R. E. 1987. Community diversity: relative roles of local and regional processes.  
341 *Science* 235(4785):167-171.

- 342 Schmida, A. and M. V. Wilson. 1985. Biological determinants of species diversity. *Journal of*  
343 *Biogeography* 12:1-20.
- 344 Sedell, J. R., G. H. Reeves, F. R. Hauer, J. A. Stanford, and C. P. Hawkins. 1990. Role of refugia  
345 in recovery from disturbances: modern fragmented and disconnected river systems.  
346 *Environmental Management* 14(5):711-724.
- 347 Supp, S. R., X. Xiao, S. K. M. Ernest, and E. P. White. 2012. An experimental test of the  
348 response of macroecological patterns to altered species interactions. *Ecology* 93(12):2505-  
349 2511.
- 350 Tews, J., U. Brose, V. Grimm, K. Tielborger, M. C. Wichmann, M. Schwager, and F. Jeltsch.  
351 2004. Animal species diversity driven by habitat heterogeneity/diversity: the importance of  
352 keystone structures. *31: 79-92*.
- 353 Tilman, D. 1982. *Resource competition and community structure*. Princeton University Press,  
354 Princeton, New Jersey, USA.
- 355 Tilman, D. 1994. Competition and biodiversity in spatially structured habitats. *Ecology* 75:2-16.
- 356 White, G. C., and K. P. Burnham. 1999. Program MARK: survival estimation from populations  
357 of marked animals. *Bird Study* 46 Supplement: 120–138.
- 358 Whittaker, R. H. 1967. Gradient analysis of vegetation. *Biological Reviews* 49:207-264.
- 359 Wilson, D. S. 1992. Complex interactions in metacommunities, with implications for  
360 biodiversity and higher levels of selection. *Ecology* 73(6):1984-2000.
- 361 Yenni, G. M., H. Ye, J. L. Simonis, E. K. Bledsoe, R. M. Diaz,...S. K. M. Ernest. 2018. portalr:  
362 create useful summaries of the Portal data. R package v0.1.4. Zenodo.  
363 <http://doi.org/10.5281/zenodo.1492721>.

364

365



366 **Figure Legends**

367

368 **Figure 1:** Relationship between *C. penicillatus* abundances on treatments and *C. baileyi*

369 abundance. (a) Average number of *C. baileyi* individuals per plot through time. (b) The

370 difference between mean *C. penicillatus* individuals per treatment type through time. The zero

371 line indicates equal numbers of *C. penicillatus* on both treatments. Points are residuals from a

372 linear model run against a 1:1 line of mean *C. penicillatus* abundance on kangaroo rat exclosures

373 against control plots. Above the zero line (positive residuals) indicates higher mean *C.*

374 *penicillatus* abundance on kangaroo rat exclosures; below the line (negative residuals) are higher

375 mean *C. penicillatus* on control plots. In (a) and (b), grey bars indicate the colonization period

376 (1995-1998) and subsequent decline (2008-2010) of *C. baileyi*. (c) Generalized least squares

377 regression of *C. penicillatus* differences from equal (y-axis from (a)) against mean *C. baileyi*

378 individuals per plot per year (y-axis from (b));  $y = -0.163x + 0.662$ ,  $df = 20$ ,  $RSE = 0.46$ ,  $p$

379  $<0.05$ ). As mean *C. baileyi* abundances increase, the mean abundance of *C. penicillatus* shifts

380 from more individuals on kangaroo rat exclosures to more on control plots.

381

382 **Figure 2.** Population-level metrics of *C. penicillatus* by treatment type. (a) Estimated survival of

383 *C. penicillatus* by treatment type and *C. baileyi* establishment in the system. (b) Probability of *C.*

384 *penicillatus* individuals moving from one treatment type to the other, also based on *C. baileyi*

385 establishment. (c) Mean new *C. penicillatus* individuals per plot through time. Grey bars indicate

386 the period of establishment (1995-1998) and subsequent decline (2008-2010) of *C. baileyi*.

387

388 **Figure 3.** Ratio of total rodent biomass in kangaroo rat exclosures to control plots though time.

389 Grey bars indicate establishment (1995-1998) and subsequent decline (2008-2010) of *C. baileyi*.

390 **Figure 1**

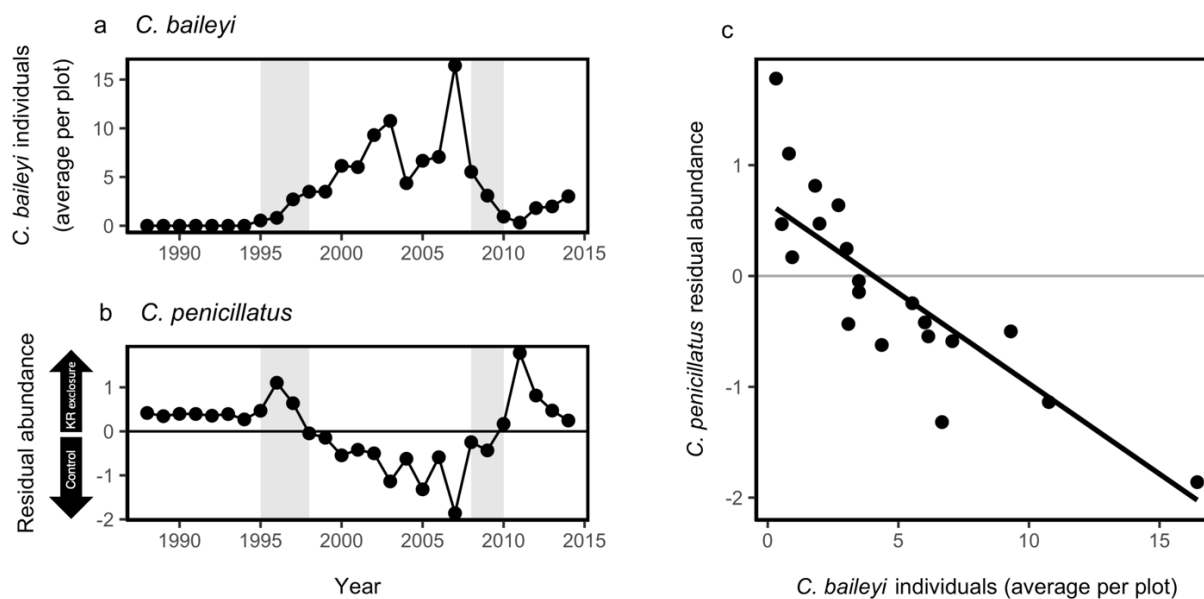

391

392 **Figure 2**

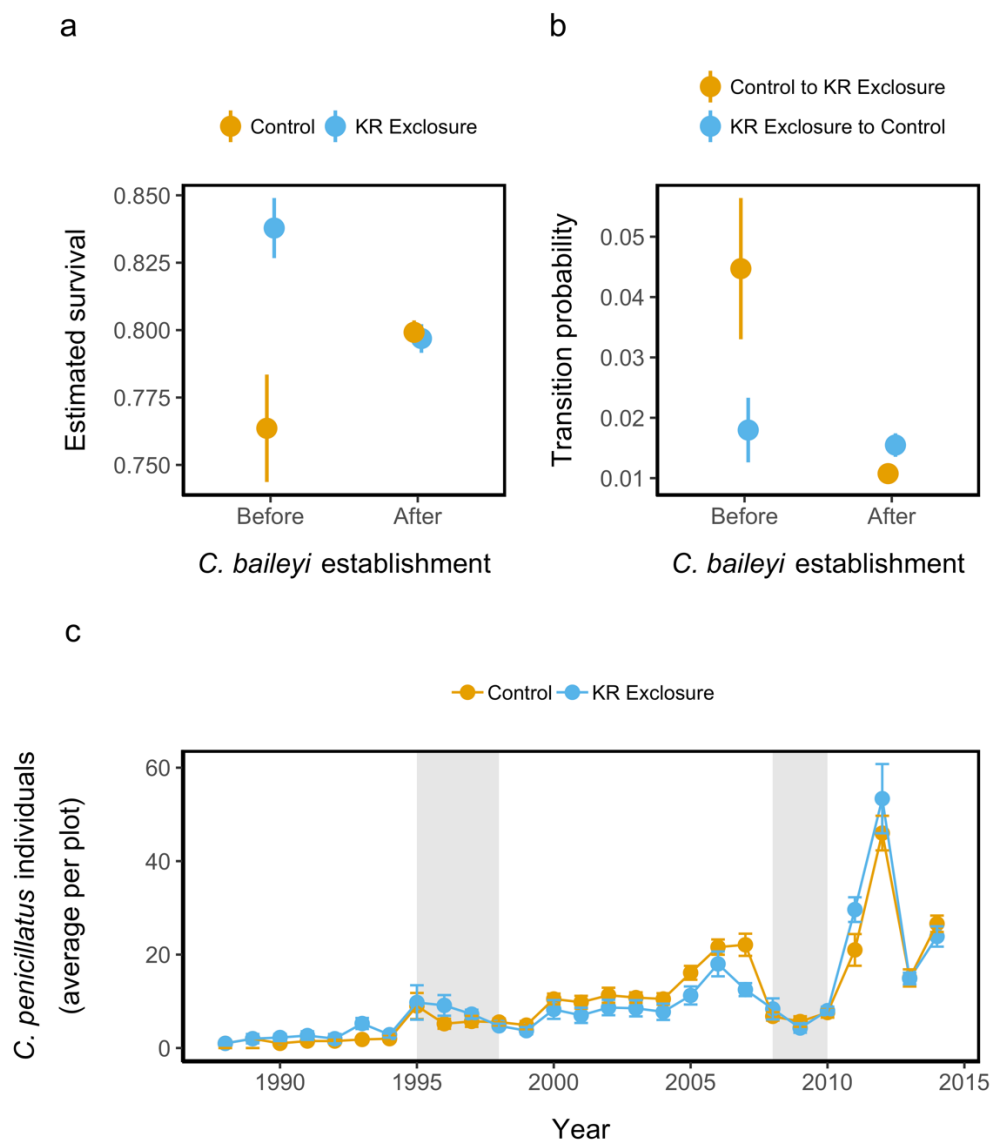

393

394

395 **Figure 3**

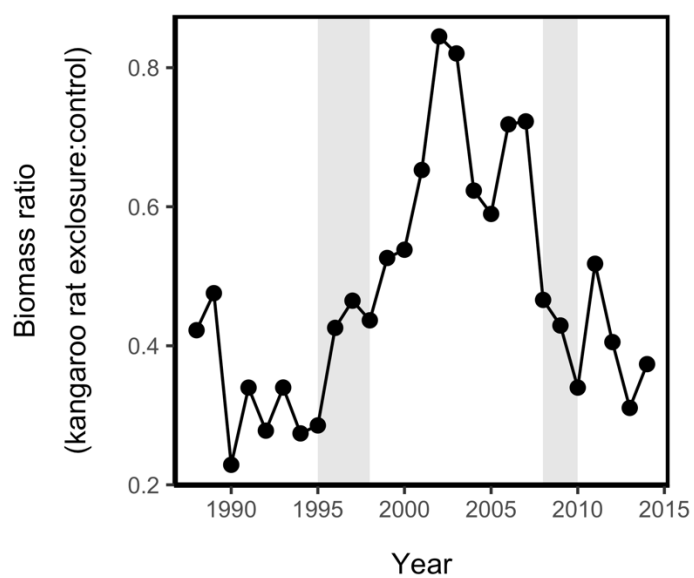

396
