1 **Temporal changes in species composition affect a ubiquitous species' use of habitat patches**

2

3 Ellen K. Bledsoe [corresponding author]

4 School of Natural Resources and Environment,

5 University of Florida

6 [ellen.bledsoe@ufl.edu](mailto:ellen.bledsoe@ufl.edu)

7

8 S. K. Morgan Ernest

9 Department of Wildlife Ecology and Conservation

10 University of Florida

11 [skmorgane@ufl.edu](mailto:skmorgane@ufl.edu)

12

13

14

15

16

17

18

19

20

21

22

23

## 24 **Abstract**

25 Across landscapes, shifts in species composition often co-occur with shifts in structural or abiotic  
26 habitat features, making it difficult to disentangle the role of competitors and environment on  
27 assessments of patch quality. Using 22 years of rodent community data from a long-term  
28 experiment, we show that a small, ubiquitous granivore (*Chaetodipus penicillatus*) shifted its use  
29 of different experimental treatments with the invasion of a novel competitor, *C. baileyi*. Changes  
30 in population metrics such as residency, probability of movement between patches, and the  
31 arrival of new individuals in patches resulted in changes in which treatment supported the  
32 highest abundances of *C. penicillatus*. Our results suggest that the invasion of a new species  
33 worsened the quality of the originally preferred treatment, probably through its impacts on  
34 resource availability. Paradoxically, the invader also increased *C. penicillatus*' use of the less  
35 preferred treatment, potentially through shifts in the competitive network on those plots.

36 **Key words:** habitat selection, patch quality, patch preference, species composition

37

## 38 **Introduction**

39 Species often exist in landscapes consisting of a patchwork of habitats, some of which are  
40 conducive to a species' survival and reproduction and others which are less suitable. Building  
41 upon intraspecific habitat selection (Fretwell & Lucas 1970) and optimal patch use theory  
42 (Charnov 1976, Brown 1988), numerous studies have shown that interspecific habitat selection  
43 can act as a potential mechanism of species coexistence (e.g., Grant 1971, Schoener 1974,  
44 Morris 1989, Morris 2003). Landscape heterogeneity creates niche opportunities (Comins &  
45 Noble 1985) while variability in patch connectivity supports scenarios where populations can be  
46 rescued from extinction by dispersal (Brown & Kodric-Brown 1977) or where species can find

47 isolated refuges when they would otherwise be driven extinct (Sedell et al. 1990). However,  
48 changes in patch conditions can also take place through time (Ernest et al. 2008), resulting in  
49 patches that vary in their suitability for a species as conditions change. Despite the fact that  
50 population dynamics and regional processes (i.e., dispersal, colonization, extinction) are  
51 inherently both spatial and temporal, temporal variation in patches is rarely incorporated into  
52 studies on patch preference.

53         While many studies on habitat selection focus on differences between patches in  
54 structural habitat (e.g., vegetation structure) or abiotic conditions (e.g., temperature, soil  
55 conditions), species density and composition can also affect patch preference (Grant 1971,  
56 Morris 1989, Danielson & Gaines 1987, Abramsky et al. 1992). Understanding a species'  
57 response to species composition is complicated because shifts in species composition often co-  
58 occur across landscapes with shifts in structural or abiotic habitat features (Whittaker 1967, Tews  
59 et al. 2004). Species may be less abundant or absent from certain patches, but whether that  
60 absence is due to the patch having an incompatible environment, the isolation of the patch from  
61 other patches, the presence of superior competitors, or a combination of any of the above reasons  
62 is often unclear. Thus, in determining how a species uses the landscape through time, it is often  
63 difficult to disentangle the roles of structural or abiotic habitat qualities from species interactions  
64 (Grant 1971, Kraft et al. 2015).

65         In this study, we use time-series data from a desert rodent community in southeastern  
66 Arizona, USA, to show how both spatial and temporal variation in the species composition in  
67 patches affect species and their use of habitat patches. Our system has both control plots (all  
68 rodents have access) and manipulated plots in which kangaroo rats, the behaviorally dominant  
69 genus in the system, are selectively excluded. Recent studies have shown only minimal impacts

70 of the treatment on the plant community (Supp et al. 2012); thus, this system creates a landscape  
71 with patches of differing quality due primarily to differences in rodent species composition.

72 In the mid-1990s, a species of large pocket mouse (*Chaetodipus baileyi*) colonized and  
73 exhibited a preference for kangaroo rat exclosures. Here, we ask how the patch preference of a  
74 small, subdominant pocket mouse, *C. penicillatus*, across this landscape of patches with and  
75 without kangaroo rats was impacted by the arrival of the larger pocket mouse, *C. baileyi*.  
76 Because congeners are expected to compete more strongly due to their shared evolutionary  
77 history, we hypothesized that 1) *C. penicillatus* use of treatment would change with the  
78 establishment of *C. baileyi*, 2) the magnitude of change would be correlated with *C. baileyi*  
79 abundance, and 3) *C. penicillatus* residency, probability of moving between treatments, and  
80 recruitment of new individuals would show corresponding changes with the establishment of *C.*  
81 *baileyi*.

82

## 83 **Methods**

### 84 *Study System and Data*

85 We used a 22-year time series (1988 – 2010) of capture-mark-recapture rodent data  
86 collected from the Portal Project to assess how *C. penicillatus* responded to the arrival of a novel  
87 competitor, *C. baileyi*, through time. While *C. penicillatus* has been caught at the site throughout  
88 the time series, *C. baileyi* was first caught at the site in 1995. Over the next decade, *C. baileyi*  
89 became a dominant species in the system; in the late 2000s, however, *C. baileyi*'s population  
90 crashed and did not rebound (Appendix S1: Fig. S4). While *C. baileyi* individuals continue to be  
91 caught occasionally, the species is no longer dominant (see Appendix S1 for more details).

92           The Portal Project is a long-term experimental system (Brown 1998) located in the  
93 Chihuahuan desert near Portal, Arizona, USA, on colonized land of the Chiricahua Apache now  
94 under the jurisdiction of the U.S. Bureau of Land Management. The site consists of 24 50x50 m  
95 fenced plots with three treatments. In control plots ( $n = 10$ ), holes cut in the fence are large  
96 enough to allow all rodent species access while full rodent removal plots ( $n = 6$ ) have no gates.  
97 Kangaroo rat exclosures ( $n = 8$ ) have small holes in the fences which allow passage of all rodents  
98 except for kangaroo rats (*Dipodomys* genus), which are behaviorally dominant in the system  
99 (Brown & Heske 1990).

100           In this study, we primarily use data from 18 plots—controls and kangaroo rat  
101 exclosures—though we include data from full removals in calculations of residency and  
102 probability of movement between treatments to increase estimate accuracy. Each plot consists of  
103 49 evenly-spaced permanent trapping stations in a 7x7 grid. Rodent abundance and composition  
104 data are collected monthly using Sherman live traps (Ernest et al. 2018). We identify trapped  
105 individuals to species, measure and record size and sex characteristics, and give each rodent an  
106 individualizing marker (previously toe and ear tags, now exclusively passive integrated  
107 transponder (PIT) tags).

108           We only use data through 2010 because this is when *C. baileyi* was no longer dominant  
109 in the system. Including additional data through 2014 (treatments for many plots were changed  
110 in early 2015) produced qualitatively similar results (Appendix S1: Fig. S1-S3).

### 111 ***Patch use of C. penicillatus in response to C. baileyi abundance***

112           We assessed changes in relative abundance of *C. penicillatus* between control plots and  
113 kangaroo rat exclosures by fitting a linear model along the 1:1 line of mean *C. penicillatus* per  
114 plot by year in kangaroo rat exclosures against control plots. We then fit a linear generalized

115 least squares model (*nlme*, Pinheiro et al. 2018) of mean *C. baileyi* per plot by year against the  
116 resulting residuals from the previous model, accounting for temporal autocorrelation (see  
117 supplements), to evaluate how *C. penicillatus*' habitat use shifted with increases in *C. baileyi*  
118 abundance.

### 119 ***Population-level metrics of C. penicillatus***

120 For *C. penicillatus* in each treatment, we calculated apparent survival ( $S$ ), transition  
121 probability ( $\Psi$ ), and the average number of new individuals per treatment. Both survival and  
122 transition probability were estimated through a multistate capture-mark-recapture model using  
123 the *RMark* package, an R interface for the MARK software (White & Burnham 1999, Laake  
124 2013). Different strata represented treatment types, and each time step was a trapping period. We  
125 designated each time period as being either before or after the establishment of *C. baileyi*; the  
126 first trapping period in which *C. baileyi* was caught in all eight kangaroo rat exclosures (July  
127 1997) was used as the differentiating time point. We assumed that recapture probabilities ( $p$ )  
128 were equal between the treatments. Our data do not allow for differentiation between permanent  
129 emigration and death, so these two processes are not differentiated in our survival estimates; we  
130 believe that any differences in apparent survival are driven primarily by emigration and,  
131 therefore, will hereafter refer to this metric as residency. We used Program CONTRAST, a  
132 program designed specifically for comparing survival estimates (Hines & Sauer 1989), to run  
133 chi-squared tests to determine the significance of differences in residency and transition  
134 probabilities between *C. baileyi* establishment and treatments.

135 We calculated the number of new *C. penicillatus* individuals, defined as individuals  
136 caught and given identification tags for the first time, in each treatment. Using mean new *C.*

137 *penicillatus* individuals per plot by year, we ran a linear mixed effects model (*nlme*, Pinheiro et  
138 al. 2018) to assess the interaction between treatments and *C. baileyi* establishment.

### 139 ***System-level aspects of patch preference***

140 Changes in species composition can have substantial effects on the energy use in a  
141 system (Ernest & Brown 2001). To determine how this aspect of ecosystem functioning might  
142 have contributed to *C. penicillatus* use of patches through time, we calculated the ratio of total  
143 energy use per year between the kangaroo rat exclosures and controls (*portalr*, Yenni et al.  
144 2018).

### 145 ***Analyses***

146 All analyses were performed using R 3.5.0 (R Core Team 2018). Data and code are  
147 available on GitHub ([https://github.com/bleds22e/PP\\_shifts](https://github.com/bleds22e/PP_shifts)).

148

## 149 **Results**

### 150 ***Patch use of C. penicillatus in response to C. baileyi abundance***

151 After its arrival in 1995, *C. baileyi* increased in abundance until the late 2000s (Fig. 1a)  
152 and was found far more frequently on the kangaroo rat exclosures than the control plots  
153 (Appendix S1: Fig. S4). *C. penicillatus*' preferences for the two treatment types also shifted  
154 through time (Fig. 1b). *C. penicillatus* had higher average abundance in the kangaroo rat  
155 exclosure plots before *C. baileyi* arrived. During the time *C. baileyi* was established, however, *C.*  
156 *penicillatus* had an even higher average abundance on controls. *C. penicillatus*'s preference for  
157 control plots increased with increases in *C. baileyi* abundance (Fig. 1c;  $y = -0.14x + 0.40$ ,  $df =$   
158 16,  $RSE = 0.40$ ,  $p < 0.001$ ).

### 159 ***Population-level metrics of C. penicillatus***

160 Residency of *C. penicillatus* depended on treatment and *C. baileyi* status ( $\chi^2 = 10.72$ , df =  
161 3,  $p = 0.01$ ). Before *C. baileyi* colonized the site, residency for *C. penicillatus* was significantly  
162 higher on kangaroo rat exclosures than on controls (Fig. 2a). This difference completely  
163 disappeared after *C. baileyi* established, at which point residency became statistically  
164 indistinguishable between treatments.

165 The transition probability of *C. penicillatus* also depended on treatment and *C. baileyi*  
166 status ( $\chi^2 = 16.53$ , df = 3,  $p < 0.001$ ). The probability of a *C. penicillatus* individual moving from  
167 a kangaroo rat exclosure to a control plot was low, regardless of *C. baileyi* establishment (Fig.  
168 2b). When a *C. penicillatus* individual moved before *C. baileyi*'s arrival, it was more likely to  
169 move from a control plot to a kangaroo rat exclosure. Afterwards, however, the probability of a  
170 *C. penicillatus* individual moving from a control plot to a kangaroo rat exclosure was not only  
171 significantly lower than before *C. baileyi* establishment but also significantly lower than the  
172 probability of movement in the other direction (Fig. 2b).

173 The significant interaction between treatments and *C. baileyi* establishment in new (i.e.,  
174 untagged) *C. penicillatus* individuals also supports changes in patch preference (Fig. 2c). Before  
175 the arrival of *C. baileyi*, kangaroo rat exclosures had significantly higher numbers of new  
176 individuals appearing ( $F_{1,389} = 24.87$ ,  $p < 0.001$ ); after *C. baileyi* established in the system, new  
177 individuals were consistently found on control plots in higher average numbers until the period  
178 of *C. baileyi* decline in the late 2000s.

### 179 *System-level aspects of patch preference*

180 Prior to *C. baileyi* fully establishing in the system, the energy on kangaroo rat exclosures  
181 was only a fraction of that on control plots (Fig. 3). With the arrival of *C. baileyi*, however, the



182 average energy on kangaroo rat exclosure plots reached over 80% of the energy used on control  
183 plots, even with *C. penicillatus* individuals moving to the control plots.

184

## 185 **Discussion**

186 Our results suggest that the arrival of a congener changed perceptions of patch quality for  
187 one of the abundant rodent species in our ecosystem, *C. penicillatus*. Changes in patch use can  
188 be driven by perceived declines in an individual's current patch or perceived increases in quality  
189 in another patch. Increases in new *C. penicillatus* individuals on the controls and declines in  
190 residency on kangaroo rat exclosures suggest that both of these mechanisms may have occurred  
191 with the arrival of *C. baileyi*, ultimately shifting patch use by *C. penicillatus*.

192 Declines in the perceived quality of kangaroo rat exclosures—as evidenced by declines in  
193 *C. penicillatus* residency—could have been caused by changes in resource availability after the  
194 arrival of *C. baileyi* (Fig. 1). Before *C. baileyi* established, rodent energy use on the kangaroo rat  
195 exclosures was never more than half of that found in the control plot (Fig. 3). With the  
196 preferential establishment of *C. baileyi* on the kangaroo rat exclosures, however, the energy ratio  
197 between the exclosure and control plots increased considerably. If patches have roughly the same  
198 amount of resources, patches with lower rates of energy use should have more resources that are  
199 not being fully exploited (MacArthur & Pianka 1966). Because the two species are congeners,  
200 niche similarities due to a shared evolutionary history may have increased the possibility of  
201 substantive overlap in their resource preferences. Thus, the colonization of *C. baileyi* on  
202 kangaroo rat exclosures may have had a substantive effect on rates of resource use on those  
203 plots, thus altering foraging and fitness expectations for *C. penicillatus*. This could explain the  
204 corresponding declines in residency for *C. penicillatus* (Fig. 2a) on kangaroo rat exclosures.

205 However, while this explains why kangaroo rat enclosures may have been perceived as worse  
206 environments after the arrival of *C. baileyi*, this does not explain why controls were suddenly  
207 able to support higher numbers of *C. penicillatus*.

208 Greater increases in abundances of *C. penicillatus* on controls than on kangaroo rat  
209 enclosures suggest that *C. penicillatus* perceived improvements in the quality of those patches.  
210 Since *C. penicillatus*' residency and transition probabilities were similar between treatments after  
211 the arrival of *C. baileyi*, increases in abundance appear to be due to higher numbers of new  
212 individuals arriving on controls (Fig. 2c). These new individuals could be due to increases in  
213 birth rates, immigration rates or juvenile survivorship or decreases in juvenile dispersal rates, but  
214 we unfortunately do not have the data to discern the source of the new individuals.

215 Higher immigration rates into some patches over others can reflect differences in  
216 distances to source populations (i.e., mass effects or source-sink dynamics; Holt 1985, Pulliam  
217 1988) or active decisions by individuals based on their expected fitness or resource intake rate in  
218 a patch, which is indicative of density-dependent habitat selection (e.g., Grant 1971, Brown &  
219 Munger 1985, Morris 1987, Abramsky et al. 1992, Morris & MacEachern 2010). Because our  
220 patches are interspersed in a matrix that is suitable habitat for *C. penicillatus*, all patches should  
221 be equidistant from a *C. penicillatus* source population. We also see no reason *C. penicillatus*  
222 should perceive control plots as improved based on abiotic conditions, habitat structure, or  
223 resource availability. At the scale of the site, all plots experience the same weather and our  
224 measure of rodent energy use suggests that resource availability on the two plot types is very  
225 similar (Fig 3). Furthermore, while the site has experienced vegetation changes (Brown 1998),  
226 there is no indication that this has differed by treatment (Ernest 2001).

227           The movement of *C. penicillatus* to control plots after the establishment of *C. baileyi*  
228 presents an interesting dilemma. If there were ecological opportunities (e.g., resource  
229 availability, territory, etc.) for *C. penicillatus* in the control plots after *C. baileyi* become  
230 established on the kangaroo rat exclosures, why was *C. penicillatus* not utilizing that space  
231 previously? After *C. baileyi* established in the system, control plots tended to have a higher  
232 abundance of competitors (*Dipodomys spp.* and *C. baileyi*) than kangaroo rat exclosures ( $p <$   
233  $0.001$ , Appendix S1: Fig. S5), making density-dependent habitat selection an unlikely  
234 explanation. Coexistence theory provides another interesting possibility. Resource competitors  
235 that would be unable to coexist if they interacted only with each other can actually benefit each  
236 other when they share a common competitor (Levine 1976, Stone & Roberts 1991, Allesina and  
237 Levine 2011). At our site, while *C. baileyi* showed a preference for kangaroo rat exclosures over  
238 controls, they were still present on control plots in considerable numbers (Fig. S1; Thibault and  
239 Brown 2008). Both natural history and observed dynamics at our site have shown that *C. baileyi*  
240 also competes with kangaroo rats (Thibault and Brown 2008), probably due to its similar size  
241 and dietary overlap (Reichman 1975). Thus, in this “enemy of my enemy is my friend” scenario,  
242 the shifts in the competitive network caused by adding *C. baileyi* to controls may have  
243 paradoxically improved conditions on control plots for *C. penicillatus*, leading to higher vital  
244 rates, more new individuals, and higher abundances on controls.

245           Species’ perceptions of patch quality can vary depending on a variety of factors, such as  
246 resource availability (MacArthur & Pianka 1966), biotic interactions (Grant 1971, Abramsky et  
247 al. 1992), and other habitat properties (Brown 1988). Changes in patch quality and selection can  
248 also affect communities and metacommunities through landscape-level processes (e.g., dispersal,  
249 colonization/extinction; Pulliam & Danielson 1991, Resetarits & Silberbush 2016). In this study,

250 we used an experimental long-term study to show how species invasion and resulting shifts in  
251 the species composition can affect a species' perception of patch quality and patch preference.  
252 This is not to suggest that changes in structural habitat or abiotic factors do not impact patch  
253 preference; much work in landscape ecology and metacommunity theory has shown that they can  
254 (Leibold & Chase 2018); rather, we use time series and experimentally manipulated patches to  
255 tease apart the effects of species composition from those of structural or abiotic habitat  
256 differences, changes which frequently occur together spatially. This method allows us to still  
257 assess spatial use patterns—a key aspect of metacommunity theory—while also allowing  
258 changes through time to inform our observations. We suggest that time is a key component in  
259 any holistic study of patch preference in community structure and metacommunity dynamics.

260

## 261 **Acknowledgments**

262 We thank the UF Weecology group for helpful feedback, Dr. J. Simonis for statistical  
263 advice, and Dr. S. R. Supp for making R code from a previous project openly available, making  
264 our analyses substantially easier. We also thank Drs. D. Morris and B. Danielson and an  
265 anonymous reviewer for comments improving the manuscript. We thank the hundreds of people  
266 who have worked on the Portal Project to make these data available. This work was supported by  
267 National Science Foundation grant DEB-1622425 to SKME. EKB was also supported by the UF  
268 School of Natural Resources and Environment.

269

## 270 **Literature Cited**

271 Abramsky, Z., M. L. Rosenzweig, and A. Zubach. 1992. The shape of a gerbil isocline: an  
272 experimental field study. *Oikos* 63(2):193-199.

- 273 Allesina, S., and J. M. Levine. 2011. A competitive network theory of species diversity.  
274 Proceedings of the National Academy of Sciences USA 108(14):5638-5642.
- 275 Brown, J. H. 1998. The granivory experiments at Portal. In W. J. Resetarits and J. Bernardo,  
276 editors. *Experimental ecology: issue and perspectives*. Oxford University Press, New York,  
277 New York, USA.
- 278 Brown, J. H., and E. Heske. 1990. Control of a desert-grassland transition by a keystone rodent  
279 guild. *Science* 250(4988):1705-1707.
- 280 Brown, J. H., and A. Kodric-Brown. 1977. Turnover rates in insular biogeography: effect of  
281 immigration on extinction. *Ecology* 58(2):445-449.
- 282 Brown, J. H., and J. C. Munger. 1985. Experimental manipulation of a desert rodent community:  
283 food addition and species removal. *Ecology* 66(5):1545-1563.
- 284 Brown, J. S. 1988. Patch use as an indicator of habitat preference, predation risk, and  
285 competition. *Behavioral Ecology and Sociobiology* 22(1):37-47.
- 286 Charnov, E. L. 1976. Optimal foraging, the marginal value theorem. *Theoretical Population*  
287 *Biology* 9(2):129-136.
- 288 Comins, H. N., and I. R. Noble. 1985. Dispersal, variability, and transient niches: species  
289 coexistence in a uniformly variable environment. *The American Naturalist* 126(5): 706-723.
- 290 Danielson, B. J., and M. S. Gaines. 1987. The influence of conspecific and heterospecific  
291 residents on colonization. *Ecology* 68(6):1778-1784.
- 292 Ernest, S. K. M. 2001. Emergent properties of a Chihuahuan desert ecosystem (Doctoral  
293 dissertation). Retrieved from ProQuest (Accession No 304705060).
- 294 Ernest, S. K. M, and J. H. Brown. 2001. Delayed compensation for missing keystone species by  
295 colonization. *Science* 292:101-104.

- 296 Ernest, S. K. M., J. H. Brown, K. M. Thibault, E. P. White, and J. P. Goheen. 2008. Zero-sum,  
297 the niche, and metacommunities: long-term dynamics of community assembly. *The*  
298 *American Naturalist* 172(6):E257-69.
- 299 Ernest, S. K. M., G. M. Yenni, G. Allington, E. K. Bledsoe, E. M. Christensen,... T. J. Valone.  
300 2018. The Portal Project: a long-term study of a Chihuahuan desert ecosystem. bioRxiv  
301 332783 [Preprint]. <https://doi.org/10.1101/332783>.
- 302 Fretwell, S. D., and H. L. Lucas, Jr. 1970. On the territorial behavior and other factors  
303 influencing habitat distribution of birds. *Acta Biotheoretica* 19:16-36.
- 304 Grant, P. R. 1971. Experimental studies of competitive interaction in a two-species system.  
305 *Journal of Animal Ecology* 40(2):323-350.
- 306 Hines, J.E., and J.R. Sauer. 1989. Program CONTRAST—A general program for the analysis of  
307 several survival or recovery rate estimates. US Fish & Wildlife Service, Fish & Wildlife  
308 Technical Report 24, Washington, DC.
- 309 Holt, R. D. 1985. Population dynamics in two-patch environments: some anomalous  
310 consequences of an optimal habitat distribution. *Theoretical Population Biology* 18:363-373.
- 311 Kraft, N. J. B., P. B. Adler, O. Godoy, E. C. James, S. Fuller, and J. M. Levine. 2015.  
312 Community assembly, coexistence and the environmental filtering metaphor. *Functional*  
313 *Ecology* 29:592-599.
- 314 Laake, J. L. 2013. RMark: An R interface for analysis of capture-recapture data with MARK.  
315 AFSC Processed Rep 2013-01, 25p. Alaska Fish. Sci. Cent., NOAA, Natl. Mar. Fish. Serv.,  
316 7600 Sand Point Way NE, Seattle, WA 98115.
- 317 Leibold, M. A., and J. M. Chase. 2018. *Metacommunity Ecology*. Princeton University Press,  
318 Princeton, New Jersey, USA.

- 319 Levine, S. H. 1976. Competitive interactions in ecosystems. *The American Naturalist*  
320 110(976):903-910.
- 321 MacArthur, R. W., and E. R. Pianka. 1966. On optimal use of a patchy environment. *The*  
322 *American Naturalist* 100(916):603-609.
- 323 Morris, D. W. 1987. Tests of density-dependent habitat selection in a patchy environment.  
324 *Ecological Monographs* 57(4):269-281.
- 325 Morris, D. W. 1989. Habitat-dependent estimates of competitive interaction. *Oikos* 55:111-120.
- 326 Morris, D. W. 2003. Towards an ecological synthesis: a case for habitat selection. *Oecologia*  
327 136:1-13.
- 328 Morris, D. W., and J. T. MacEachern. 2010. Active density-dependent habitat selection in a  
329 controlled population of small mammals. *Ecology* 91(11):3131-3137.
- 330 Pinheiro, J., D. Bates, S. DebRoy, D. Sarkar, and R Core Team. 2018. nlme: linear and nonlinear  
331 mixed effects models. R package version 3.1-131.1, URL: [https://CRAN.R-](https://CRAN.R-project.org/package=nlme)  
332 [project.org/package=nlme](https://CRAN.R-project.org/package=nlme).
- 333 Pulliam, H. R. 1988. Sources, sinks, and population regulation. *The American Naturalist*  
334 132(5):652-661.
- 335 Pulliam, H. R., and B. J. Danielson. 1991. Sources, sinks, and habitat selection: a landscape  
336 perspective on population dynamics. *The American Naturalist* 137:S51-S66.
- 337 R Core Team. 2018. R version 3.5.0. R: A language and environment for statistical computing. R  
338 Foundation for Statistical Computing, Vienna, Austria.
- 339 Reichman, O. J. 1975. Relation of desert rodent diets to available resources. *Journal of*  
340 *Mammalogy* 56(4):731-751.

- 341 Resetarits, W. J., Jr., and A. Silberbush. 2016. Local contagion and regional compression: habitat  
342 selection drives spatially explicit, multiscale dynamics of colonization in experimental  
343 metacommunities. *Ecology Letters* 19:191-200.
- 344 Schoener, T. W. 1974. Resource partitioning in ecological communities. *Science* 185:27-39.
- 345 Sedell, J. R., G. H. Reeves, F. R. Hauer, J. A. Stanford, and C. P. Hawkins. 1990. Role of refugia  
346 in recovery from disturbances: modern fragmented and disconnected river systems.  
347 *Environmental Management* 14(5):711-724.
- 348 Stone, L., and A. Roberts. 1991. Conditions for a species to gain advantage from the presence of  
349 competitors. *Ecology* 72(6):1964-1972.
- 350 Supp, S. R., X. Xiao, S. K. M. Ernest, and E. P. White. 2012. An experimental test of the  
351 response of macroecological patterns to altered species interactions. *Ecology* 93:2505-2511.
- 352 Tews, J., U. Brose, V. Grimm, K. Tielborger, M. C. Wichmann, M. Schwager, and F. Jeltsch.  
353 2004. Animal species diversity driven by habitat heterogeneity/diversity: the importance of  
354 keystone structures. *Journal of Biogeography* 31:79-92.
- 355 Thibault, K. M., and J. H. Brown. 2008. Impact of an extreme climatic event on community  
356 assembly. *Proceedings of the National Academy of Science USA* 106(9):3410-3415.
- 357 White, G. C., and K. P. Burnham. 1999. Program MARK: survival estimation from populations  
358 of marked animals. *Bird Study* 46 Supplement: 120–138.
- 359 Whittaker, R. H. 1967. Gradient analysis of vegetation. *Biological Reviews* 49:207-264.
- 360 Yenni, G. M., H. Ye, J. L. Simonis, E. K. Bledsoe, R. M. Diaz,...S. K. M. Ernest. 2018. portalr:  
361 create useful summaries of the Portal data. R package v0.1.4. Zenodo.  
362 <http://doi.org/10.5281/zenodo.1492721>.



363 **Figure Legends**

364 **Figure 1:** Relationship between *C. penicillatus* abundances on treatments and *C. baileyi*  
365 abundance. (a) Average number of *C. baileyi* individuals per plot through time. (b) The  
366 difference between mean *C. penicillatus* individuals per treatment through time. The zero line  
367 indicates equal numbers of *C. penicillatus* on both treatments. Points are residuals from a linear  
368 model run against a 1:1 line of mean *C. penicillatus* abundance on kangaroo rat exclosures  
369 against controls. Above the zero line (positive residuals) indicates higher mean *C. penicillatus*  
370 abundance on kangaroo rat exclosures; below the line (negative residuals) are higher mean *C.*  
371 *penicillatus* on controls. In (a) and (b), grey bars indicate the colonization period (1995-1998)  
372 and subsequent decline (2008-2010) of *C. baileyi*. (c) Generalized least squares regression of *C.*  
373 *penicillatus* differences from equal (y-axis from [a]) against mean *C. baileyi* individuals per plot  
374 per year (y-axis from [b]). As mean *C. baileyi* abundances increase, the mean abundance of *C.*  
375 *penicillatus* shifts from more individuals on kangaroo rat exclosures to more on controls.

376  
377 **Figure 2.** Population-level metrics of *C. penicillatus* by treatment type. (a) Residency of *C.*  
378 *penicillatus* by treatment and *C. baileyi* establishment in the system. (b) Probability of *C.*  
379 *penicillatus* individuals moving from one treatment to the other, also based on *C. baileyi*  
380 establishment. (c) Mean new *C. penicillatus* individuals per plot through time. Grey bars indicate  
381 the period of establishment (1995-1998) and subsequent decline (2008-2010) of *C. baileyi*.

382  
383 **Figure 3.** Ratio of total rodent energy in kangaroo rat exclosures to controls though time. Grey  
384 bars indicate establishment (1995-1998) and subsequent decline (2008-2010) of *C. baileyi*.

385 **Figure 1**

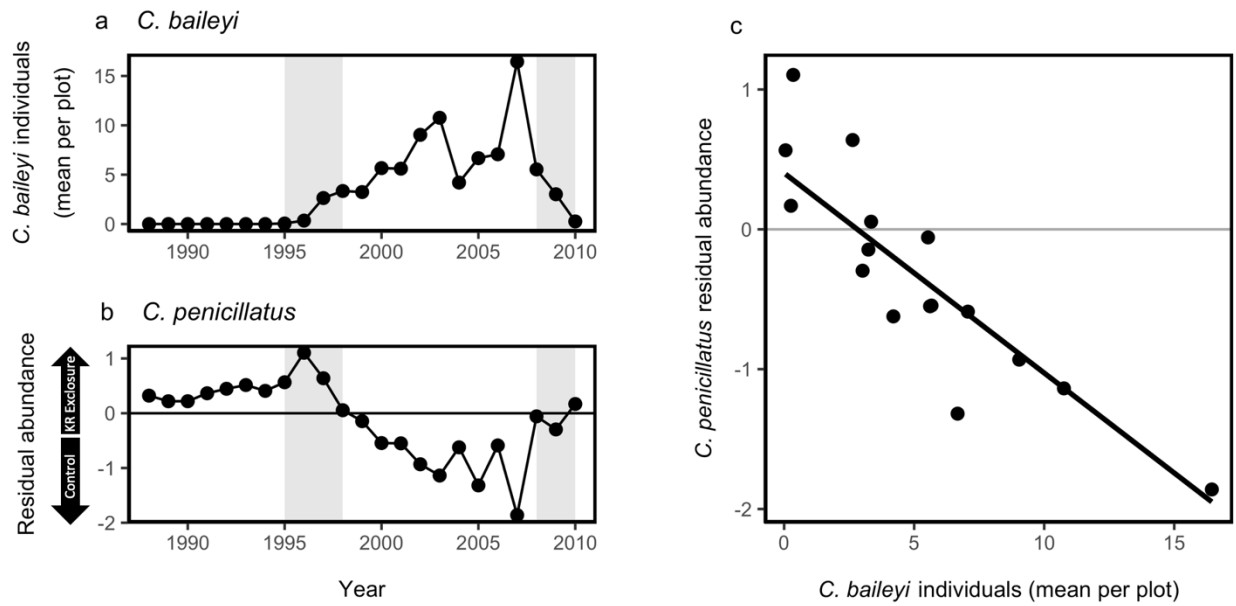

386 **Figure 2**

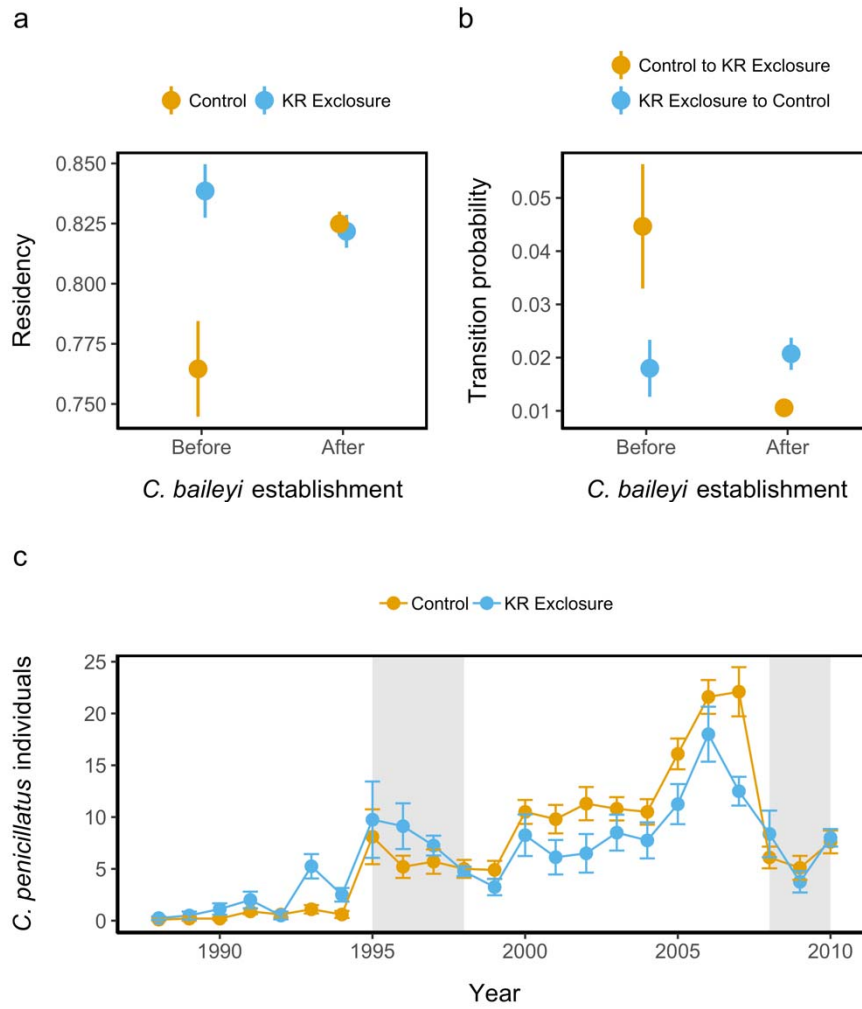

387

388

389 **Figure 3**

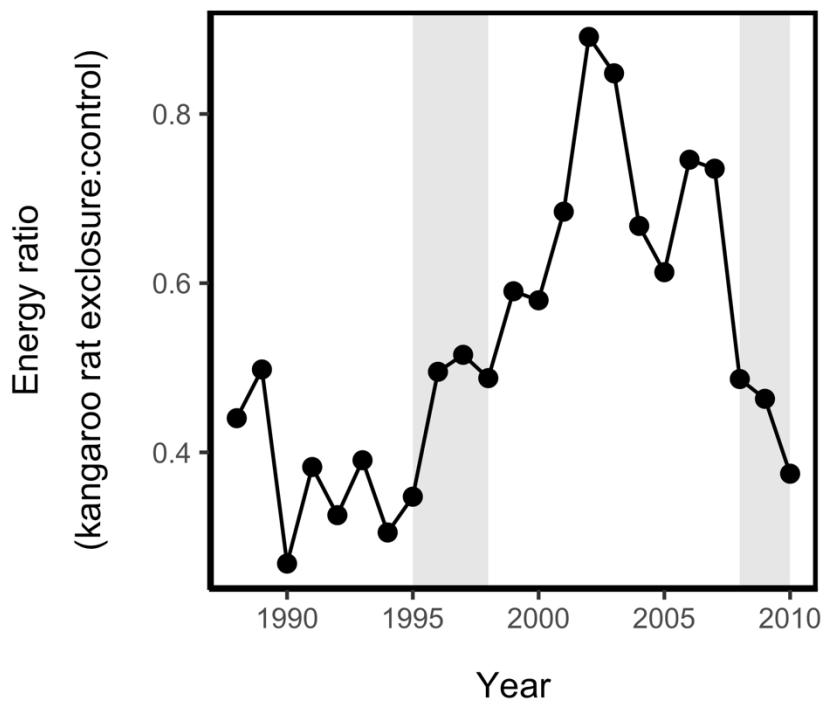

390
